# Supplementary material for: Bambini in movimento: il gioco e lo sport con una palla diversa da tutte le altre
Source: Royal Society of Chemistry journal article supplement (doi:10.1039/d2fo02128e), 2004-01-01
Supplement: d2fo02128e2.pdf [file d2fo02128e2.pdf]

**Supplement Materials-Linarin ameliorates dextran sulfate sodium-induced colitis in C57BL/6J mice via the improvement of intestinal barrier, suppression of inflammatory responses and modulation of gut microbiota**

Chengni Jin, Jiayu Liu, Ruyi Jin, Yanpeng Yao, Silan He, Min Lei, Xiaoli Peng\*

College of Food Science and Engineering, Northwest A&F University, Yangling, Shaanxi, 712100,

China

\*Corresponding author: Xiaoli Peng

Email address: pxlpxh@163.com

Fax: +86-29-87092817

**Table S1** Primer sequences used for QRT-PCR analysis

| Gene                           | Forward primer (5'-3')   | Reverse primer (5'-3')   | NCBI reference sequence |
|--------------------------------|--------------------------|--------------------------|-------------------------|
| <i>GAPDH</i>                   | AGGTCGGTGTGAACGGATTTG    | TGTAGACCATGTAGTTGAGGTCA  | NM_001289726.1          |
| <i>Muc2</i>                    | GCTGACGAGTGGTTGGTGAATG   | GATGAGGTGGCAGACAGGAGAC   | NM_023566.4             |
| <i>Occludin</i>                | ACGGACCCTGACCACTATGA     | TCAGCAGCAGCCATGTACTC     | NM_001360538.1          |
| <i>ZO-1</i>                    | GCGAACAGAAGGAGCGAGAAGAG  | GCTTTGCGGGCTGACTGGAG     | NM_009386.2             |
| <i>Claudin-1</i>               | GCTGGGTTTCATCCTGGCTTCTC  | CCTGAGCGGTCACGATGTTGTC   | NM_016674.4             |
| <i>IL-1<math>\beta</math></i>  | ACTCATTGTGGCTGTGGAGA     | TTGTTTCATCTCGGAGCCTGT    | NM_008361.4             |
| <i>TNF-<math>\alpha</math></i> | GCGACGTGGAAGTGGCAGAAG    | GCCACAAGCAGGAATGAGAAGAGG | NM_001278601.1          |
| <i>IL-6</i>                    | AGAGGAGACTTCACAGAGGATACC | AATCAGAATTGCCATTGCACAAC  | NM_001314054.1          |
| <i>IFN-<math>\gamma</math></i> | CTGGAGGAACTGGCAAAAGGATGG | GACGCTTATGTTGTTGCTGATGGC | NM_008337.4             |
| <i>IL-10</i>                   | TTCTTTCAAACAAAAGGACCAGC  | GCAACCCAAGTAACCCCTTAAAG  | NM_010548.2             |

**Table S2** Relative abundances of differential taxa based at the phylum level <sup>A</sup>

| Bacterial taxa information           | NC                           | DSS                          | Lin-H                         |
|--------------------------------------|------------------------------|------------------------------|-------------------------------|
| <i>Firmicutes</i>                    | 37.616 ± 10.772 <sup>a</sup> | 42.345 ± 9.379 <sup>a</sup>  | 32.325 ± 14.229 <sup>a</sup>  |
| <i>Bacteroidota</i>                  | 33.379 ± 5.896 <sup>a</sup>  | 29.359 ± 10.431 <sup>a</sup> | 31.129 ± 12.406 <sup>a</sup>  |
| <i>Verrucomicrobiota</i>             | 16.415 ± 14.884 <sup>a</sup> | 22.779 ± 2.915 <sup>a</sup>  | 21.531 ± 7.052 <sup>a</sup>   |
| <i>Proteobacteria</i>                | 9.527 ± 10.271 <sup>a</sup>  | 3.443 ± 2.518 <sup>a</sup>   | 12.805 ± 13.308 <sup>a</sup>  |
| <i>Desulfobacterota</i>              | 1.457 ± 0.592 <sup>a</sup>   | 0.873 ± 0.742 <sup>a</sup>   | 0.892 ± 1.085 <sup>a</sup>    |
| <i>Campylobacterota</i>              | 0.540 ± 0.577 <sup>a</sup>   | 0.419 ± 0.421 <sup>a</sup>   | 0.371 ± 0.274 <sup>a</sup>    |
| <i>Firmicutes/Bacteroidota ratio</i> | 100 ± 33.635 <sup>a</sup>    | 141.152 ± 60.06 <sup>a</sup> | 117.966 ± 97.983 <sup>a</sup> |

<sup>A</sup> Different lowercase letters in each line represent significant differences ( $p < 0.05$ ).

**Table S3** Relative abundances of differential taxa based at the genus level <sup>4</sup>

| Bacterial taxa information           | NC                           | DSS                         | Lin-H                        |
|--------------------------------------|------------------------------|-----------------------------|------------------------------|
| <i>Akkermansia</i>                   | 16.401 ± 14.897 <sup>a</sup> | 22.777 ± 2.912 <sup>a</sup> | 21.512 ± 7.057 <sup>a</sup>  |
| <i>Muribaculaceae_norank</i>         | 21.563 ± 9.571 <sup>a</sup>  | 9.184 ± 3.94 <sup>b</sup>   | 6.800 ± 6.519 <sup>b</sup>   |
| <i>Bacteroides</i>                   | 6.761 ± 8.504 <sup>a</sup>   | 10.783 ± 6.689 <sup>a</sup> | 14.510 ± 17.633 <sup>a</sup> |
| <i>Lachnospiraceae_NK4A136_group</i> | 5.869 ± 6.369 <sup>a</sup>   | 6.656 ± 3.402 <sup>a</sup>  | 2.618 ± 3.193 <sup>a</sup>   |
| <i>Clostridia_UCG-014_norank</i>     | 1.091 ± 1.332 <sup>b</sup>   | 10.910 ± 9.199 <sup>a</sup> | 1.548 ± 1.41 <sup>b</sup>    |
| <i>Blautia</i>                       | 7.956 ± 9.735 <sup>a</sup>   | 0.401 ± 0.266 <sup>a</sup>  | 3.531 ± 5.429 <sup>a</sup>   |
| <i>Escherichia-Shigella</i>          | 0.202 ± 0.248 <sup>b</sup>   | 1.348 ± 1.853 <sup>b</sup>  | 7.944 ± 9.673 <sup>a</sup>   |
| <i>[Ruminococcus]_torques_group</i>  | 0.461 ± 0.593 <sup>b</sup>   | 4.330 ± 1.198 <sup>a</sup>  | 3.257 ± 3.424 <sup>a</sup>   |
| <i>Lachnospiraceae_uncultured</i>    | 4.817 ± 2.314 <sup>a</sup>   | 1.279 ± 1.309 <sup>b</sup>  | 1.874 ± 1.519 <sup>b</sup>   |
| <i>Dubosiella</i>                    | 1.462 ± 1.948 <sup>a</sup>   | 4.048 ± 4.016 <sup>a</sup>  | 1.061 ± 1.447 <sup>a</sup>   |
| <i>Prevotellaceae_UCG-001</i>        | 0.151 ± 0.218 <sup>b</sup>   | 3.888 ± 2.855 <sup>a</sup>  | 2.210 ± 3.062 <sup>ab</sup>  |
| <i>Rikenellaceae_RC9_gut_group</i>   | 0.019 ± 0.015 <sup>a</sup>   | 2.238 ± 1.828 <sup>a</sup>  | 3.600 ± 5.917 <sup>a</sup>   |
| <i>Romboutsia</i>                    | 0.007 ± 0.013 <sup>b</sup>   | 2.206 ± 1.440 <sup>ab</sup> | 3.644 ± 3.525 <sup>a</sup>   |
| <i>Parabacteroides</i>               | 2.625 ± 3.196 <sup>a</sup>   | 0.732 ± 0.827 <sup>a</sup>  | 1.904 ± 2.829 <sup>a</sup>   |
| <i>Parasutterella</i>                | 1.828 ± 1.443 <sup>a</sup>   | 1.763 ± 0.975 <sup>a</sup>  | 1.077 ± 1.336 <sup>a</sup>   |
| <i>Turicibacter</i>                  | 0.030 ± 0.038 <sup>b</sup>   | 2.243 ± 1.962 <sup>a</sup>  | 2.352 ± 2.024 <sup>a</sup>   |
| <i>Ligilactobacillus</i>             | 1.534 ± 1.638 <sup>a</sup>   | 0.586 ± 0.504 <sup>a</sup>  | 2.389 ± 3.083 <sup>a</sup>   |
| <i>Klebsiella</i>                    | 2.298 ± 3.105 <sup>a</sup>   | 0.025 ± 0.028 <sup>a</sup>  | 1.351 ± 2.070 <sup>a</sup>   |
| <i>Citrobacter</i>                   | 2.597 ± 3.400 <sup>a</sup>   | 0.002 ± 0.006 <sup>a</sup>  | 0.938 ± 2.168 <sup>a</sup>   |
| <i>RF39_norank</i>                   | 0.287 ± 0.525 <sup>a</sup>   | 1.138 ± 1.823 <sup>a</sup>  | 1.803 ± 2.589 <sup>a</sup>   |
| <i>Desulfovibrio</i>                 | 1.297 ± 0.461 <sup>a</sup>   | 0.825 ± 0.712 <sup>a</sup>  | 0.843 ± 1.074 <sup>a</sup>   |
| <i>Lachnoclostridium</i>             | 1.457 ± 0.778 <sup>a</sup>   | 0.202 ± 0.095 <sup>b</sup>  | 0.253 ± 0.255 <sup>b</sup>   |
| <i>Paraprevotella</i>                | 0.005 ± 0.012 <sup>b</sup>   | 0.232 ± 0.432 <sup>ab</sup> | 1.650 ± 2.155 <sup>a</sup>   |
| <i>Eubacterium</i>                   | 0.009 ± 0.016 <sup>a</sup>   | 0.000 ± 0.000 <sup>a</sup>  | 0.005 ± 0.008 <sup>a</sup>   |
| <i>Faecalibaculum</i>                | 1.485 ± 1.482 <sup>a</sup>   | 0.290 ± 0.334 <sup>b</sup>  | 0.023 ± 0.029 <sup>b</sup>   |
| <i>Lactobacillus</i>                 | 1.443 ± 1.504 <sup>a</sup>   | 0.088 ± 0.088 <sup>b</sup>  | 0.199 ± 0.364 <sup>b</sup>   |
| <i>Morganella</i>                    | 1.617 ± 2.027 <sup>a</sup>   | 0.000 ± 0.000 <sup>b</sup>  | 0.021 ± 0.036 <sup>b</sup>   |
| <i>Alistipes</i>                     | 0.102 ± 0.098 <sup>b</sup>   | 1.212 ± 0.297 <sup>a</sup>  | 0.310 ± 0.328 <sup>b</sup>   |
| <i>Erysipelatoclostridium</i>        | 0.176 ± 0.151 <sup>b</sup>   | 0.204 ± 0.125 <sup>b</sup>  | 1.179 ± 1.111 <sup>a</sup>   |
| <i>Alloprevotella</i>                | 1.263 ± 0.807 <sup>a</sup>   | 0.000 ± 0.000 <sup>b</sup>  | 0.000 ± 0.000 <sup>b</sup>   |
| <i>Rikenella</i>                     | 0.060 ± 0.069 <sup>b</sup>   | 1.059 ± 0.732 <sup>a</sup>  | 0.074 ± 0.099 <sup>b</sup>   |
| <i>Roseburia</i>                     | 1.006 ± 1.119 <sup>a</sup>   | 0.000 ± 0.000 <sup>b</sup>  | 0.007 ± 0.013 <sup>b</sup>   |

<sup>4</sup> Different lowercase letters in each line represent significant differences ( $p < 0.05$ ).

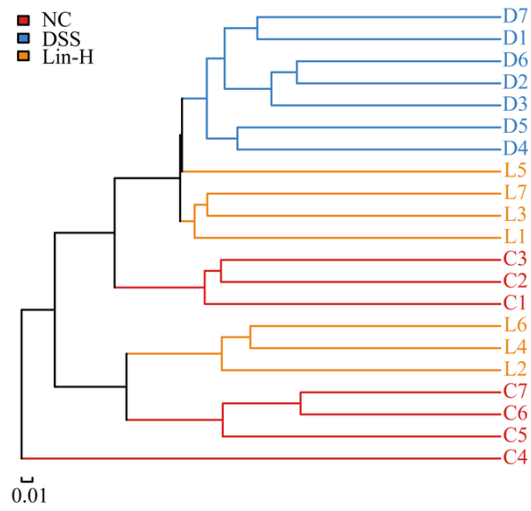

**Fig. S1** Effect of linarin on the gut microbiota structure in DSS-treated mice. Samples cluster tree based on Bray-Curtis distance matrix.
