# Supplementary figures and images for: Bambini in movimento: il gioco e lo sport con una palla diversa da tutte le altre
Source: Royal Society of Chemistry journal article supplement (doi:10.1039/d2fo02128e), 2004-01-01

Full unedited blots for Fig. 3B

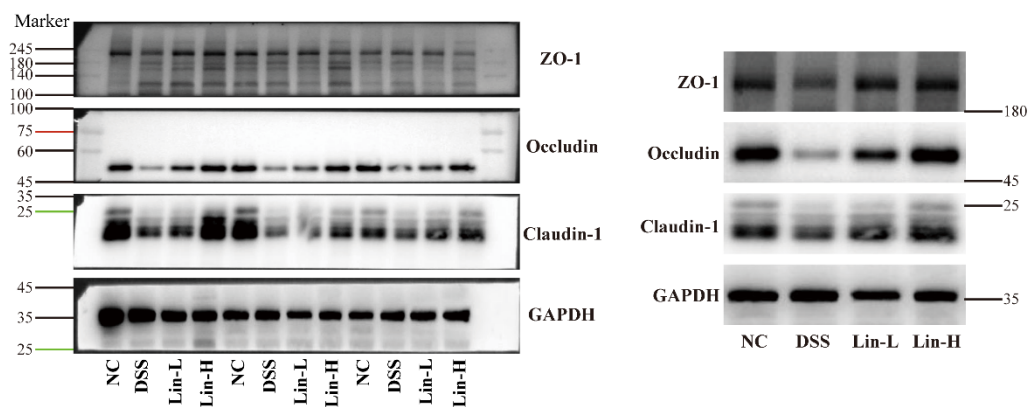

Supplement: d2fo02128e1.pdf [file d2fo02128e1.pdf]
